# Supplementary material
Source: publisher figshare collection journal article supplement (https://tandf.figshare.com/ndownloader/files/19242719)
Supplement: Supplementary file 1 [file 19242719]

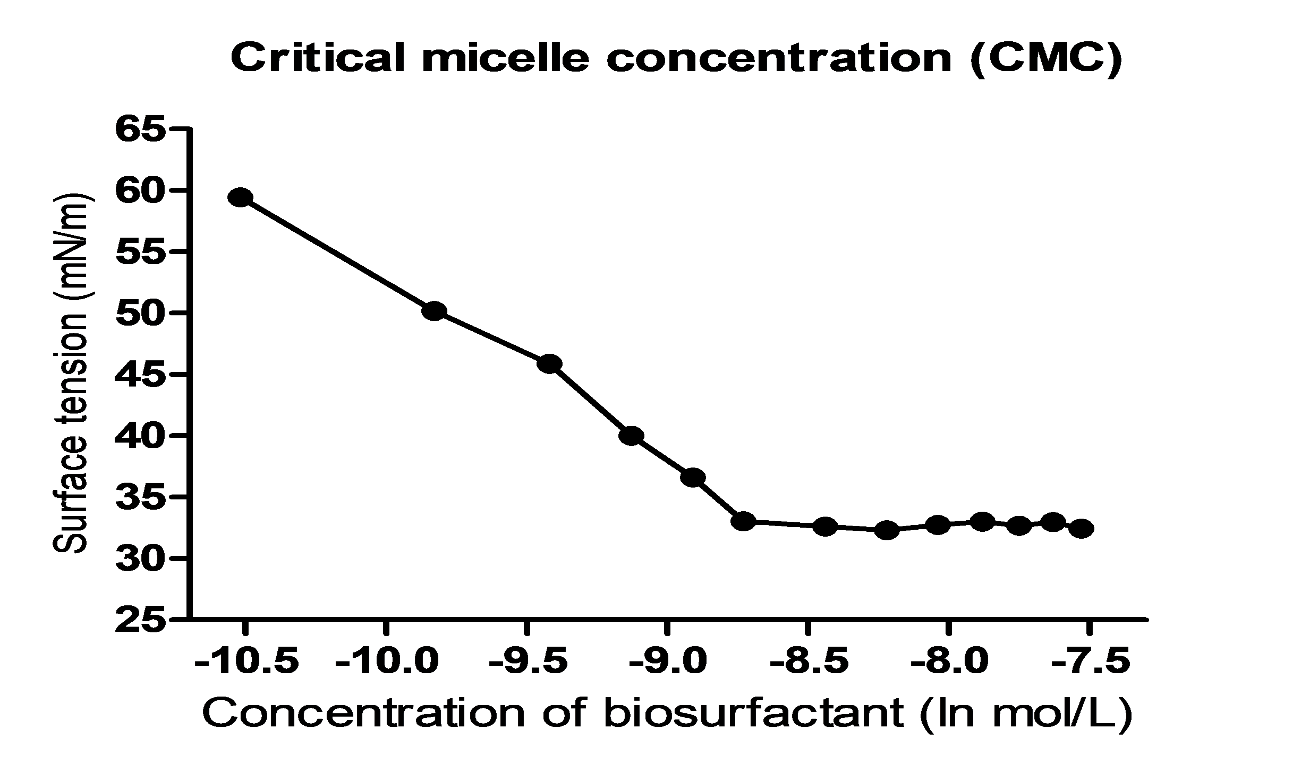


**Figure S1:** Critical micelle concentration (CMC) of kurstakin molecules produced by Bacillus thuringiensis strain 7SA


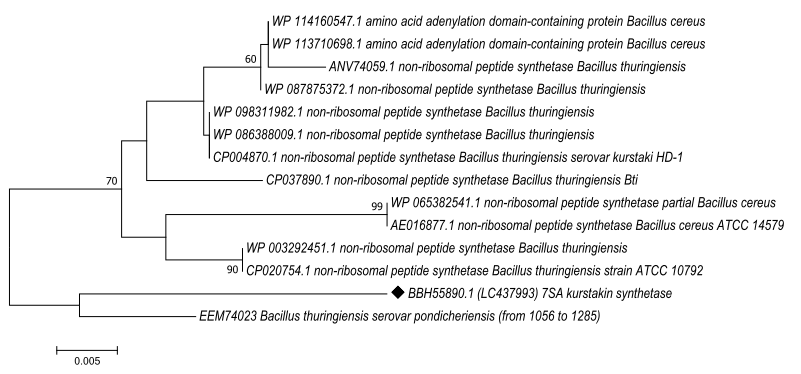


**Figure S2:** Maximum Likelihood phylogenetic trees based on the alignment of amino acid sequences of the kurstakin synthetase gene from strain 7SA. The reference sequences were retrieved from NCBI database.


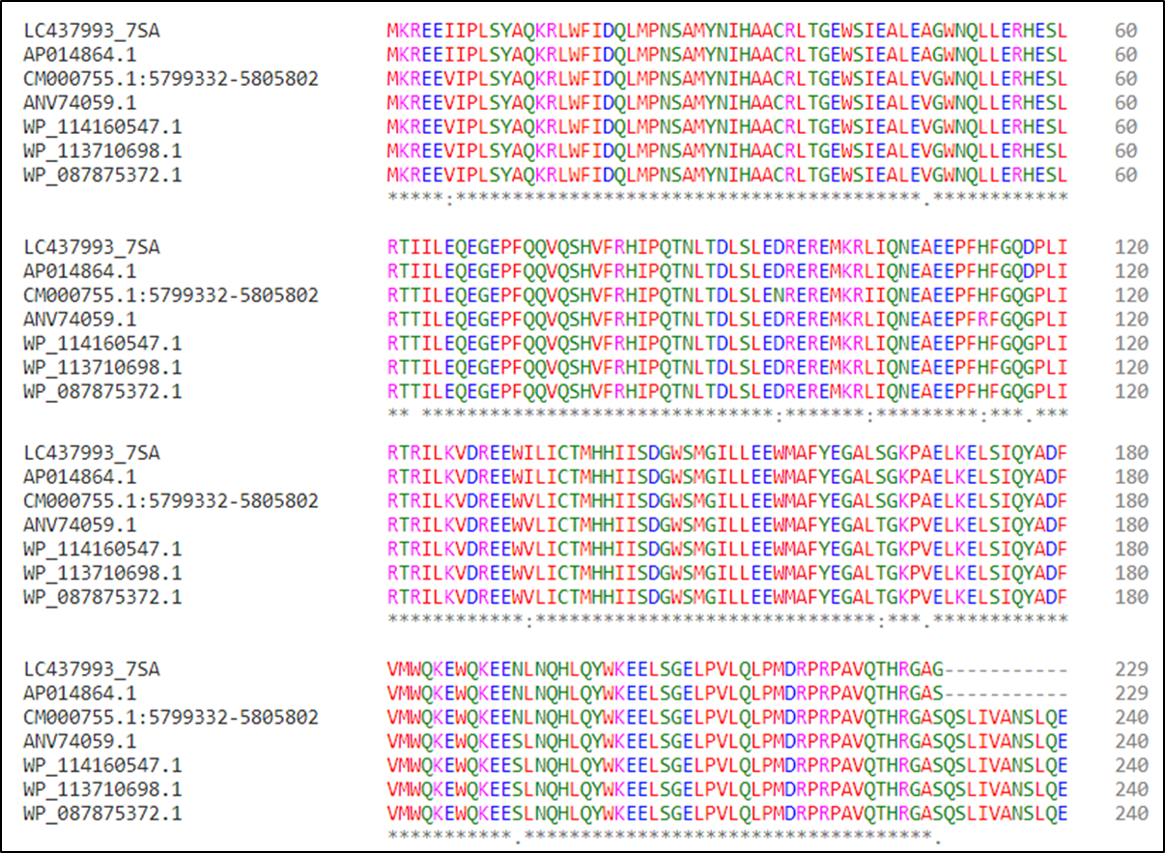


**Figure S3:** CLUSTAL O (1.2.4) multiple sequence alignment and comparison of amino acid sequences of the kurstakin synthetase gene from strain 7SA and reference sequences retrieved from NCBI database.


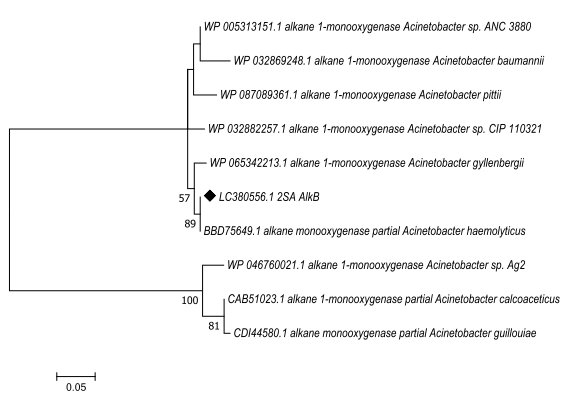


**Figure S4:** Maximum Likelihood phylogenetic trees based on the alignment of amino acid sequences of the alkB gene from strain 2SA. The reference sequences were retrieved from NCBI database.


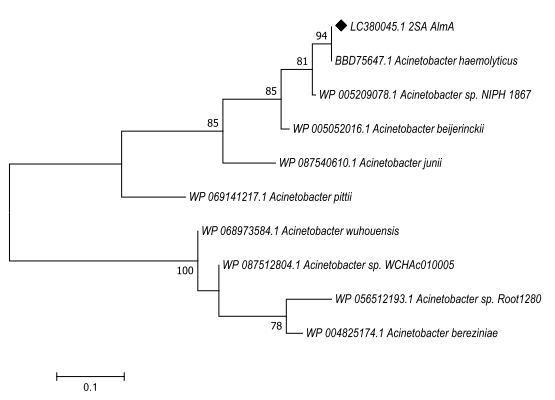


**Figure S5:** Maximum Likelihood phylogenetic trees based on the alignment of amino acid sequences of the almA gene from strain 2SA. The reference sequences were retrieved from NCBI database.


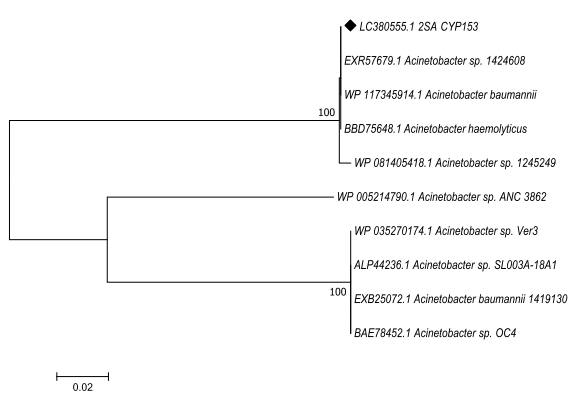


**Figure S6:** Maximum Likelihood phylogenetic trees based on the alignment of amino acid sequences of the cyp153 gene from strain 2SA. The reference sequences were retrieved from NCBI database.
